# Supplementary material for: Development and validation of the Multimorbidity Treatment Burden Questionnaire (MTBQ)
Source: PubMed Central journal article supplement (PMC5900423; doi:10.1136/bmjopen-2017-019413), 2018-04-12
Supplement: bmjopen-2017-019413supp001.pdf [file bmjopen-2017-019413supp001.pdf]

**Appendix A: Characteristics of the participants who took part in the cognitive interviews (n=8)**

| <b>Characteristic</b>                                            | <b>Value</b>        |
|------------------------------------------------------------------|---------------------|
| Mean age years (SD, min, max)                                    | 55.5 (14.1, 30, 78) |
| Male                                                             | 2 (25%)             |
| White British ethnicity                                          | 8 (100%)            |
| Mean number of self-reported long-term conditions (SD, min, max) | 2.1 (1.5, 1, 5)     |

**Appendix B: Cronbach's alpha including the optional questions (questions 3, 9 and 10) in the various combinations**

|                         | Optional questions |          |           |                 |             |              |              |
|-------------------------|--------------------|----------|-----------|-----------------|-------------|--------------|--------------|
|                         | <b>3</b>           | <b>9</b> | <b>10</b> | <b>3, 9, 10</b> | <b>3, 9</b> | <b>3, 10</b> | <b>9, 10</b> |
| <b>Cronbach's alpha</b> | 0.82               | 0.83     | 0.83      | 0.84            | 0.83        | 0.83         | 0.84         |

**Optional questions: Please tell us how much difficulty you have with the following:**

- Question 3. Paying for prescriptions, over the counter medication or equipment
- Question 9. Getting health care in the evenings and at weekends
- Question 10. Getting help from community services (e.g. physiotherapy, district nurses etc)

### Appendix C: A comparison of the floor effects and missing data of the MTBQ and the HCTD (pilot study data)

| MTBQ Question                                                                                                         | Floor effect <sup>a</sup> % | Missing data % | HCTD question with a similar latent construct | Floor effect <sup>b</sup> % | Missing data (%) |
|-----------------------------------------------------------------------------------------------------------------------|-----------------------------|----------------|-----------------------------------------------|-----------------------------|------------------|
| 1. Taking lots of medications                                                                                         | 78                          | 1              | 3. Difficulty taking medications              | 95                          | 1                |
| 2. Remembering how and when to take medication                                                                        | 80                          | 1              | 2. Difficulty planning medication schedule    | 94                          | 3                |
| 3. <i>Paying for prescriptions, over the counter medication or equipment</i>                                          | 94                          | 4              | 5. Difficulty paying prescription charges     | 78                          | 19               |
| 4. Collecting prescription medication                                                                                 | 83                          | 2              | 1. Difficulty obtaining medications           | 87                          | 1                |
| 5. Monitoring your medical conditions (eg. checking your blood pressure or blood sugar, monitoring your symptoms etc) | 83                          | 2              | No question to compare with                   |                             |                  |
| 6. Arranging appointments with health professionals                                                                   | 59                          | 3              | 6. Difficulty scheduling medical appointment  | 69                          | 4                |
| 7. Seeing lots of different health professionals                                                                      | 62                          | 2              | No question to compare with                   |                             |                  |
| 8. Attending appointments with health professionals (eg. getting time off work, arranging transport etc)              | 74                          | 1              | 7. Difficulty arranging transportation        | 76                          | 6                |
| 9. <i>Getting health care in the evenings and at weekends</i>                                                         | 70                          | 3              | No question to compare with                   |                             |                  |
| 10. <i>Getting help from community services (eg. physiotherapy, district nurses etc)</i>                              | 83                          | 2              | No question to compare with                   |                             |                  |
| 11. Obtaining clear and up-to-date information about your condition                                                   | 70                          | 2              | 8. Difficulty getting information             | 74                          | 4                |
| 12. Making recommended lifestyle changes (eg. diet and exercise)                                                      | 57                          | 3              | No question to compare with                   |                             |                  |
| 13. Having to rely on help from family and friends                                                                    | 69                          | 1              | No question to compare with                   |                             |                  |

<sup>a</sup> proportion (%) of 'does not apply' or 'not difficult' responses

<sup>b</sup> proportion (%) 'not difficult' responses

Please note: Questions 3, 9 and 10 were excluded from the main analysis due to a high proportion of 'does not apply' responses. They are shown in italics. As they may be relevant to other populations, they can be considered as optional

## Appendix D: Histogram of global MTBQ scores and global HCTD scores (pilot study and main study)

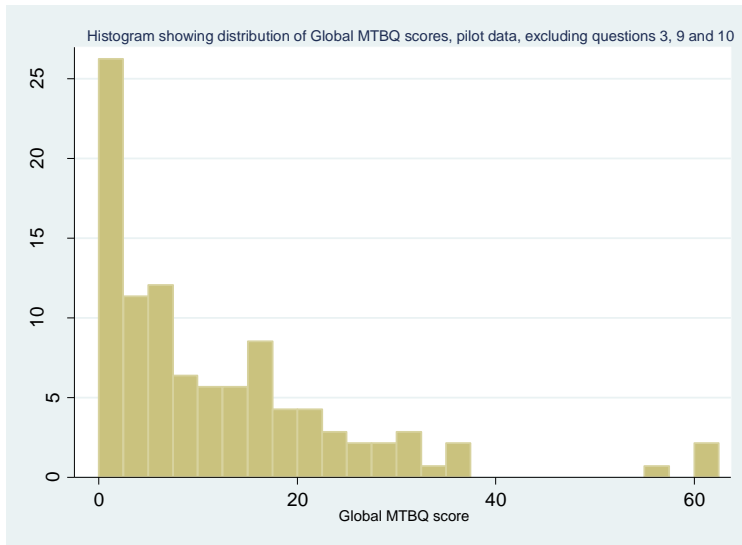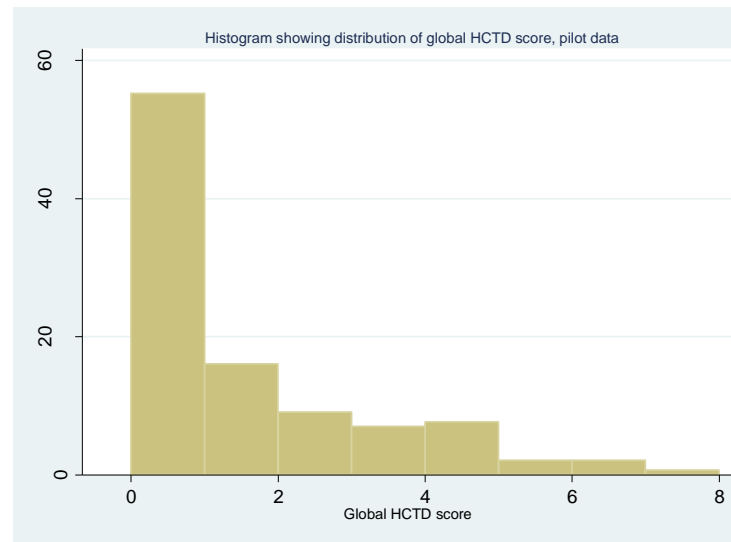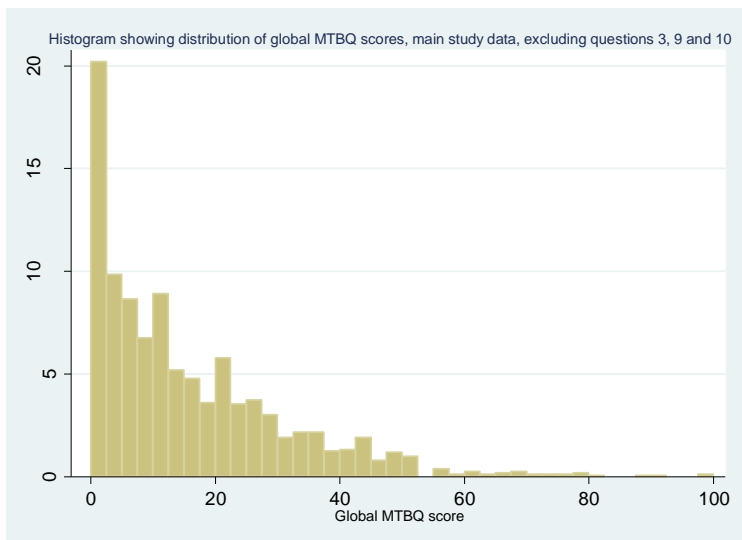

## Appendix E: Inter-item correlation coefficient and Cronbach's Alpha (main study data, excluding questions 3, 9 and 10)

Cronbach's alpha = 0.83

| Question: | 1    | 2    | 4    | 5    | 6    | 7    | 8    | 11   | 12   | 13   |
|-----------|------|------|------|------|------|------|------|------|------|------|
| 1         | 1.00 |      |      |      |      |      |      |      |      |      |
| 2         | 0.69 | 1.00 |      |      |      |      |      |      |      |      |
| 4         | 0.30 | 0.26 | 1.00 |      |      |      |      |      |      |      |
| 5         | 0.35 | 0.33 | 0.31 | 1.00 |      |      |      |      |      |      |
| 6         | 0.26 | 0.23 | 0.28 | 0.31 | 1.00 |      |      |      |      |      |
| 7         | 0.34 | 0.29 | 0.29 | 0.38 | 0.62 | 1.00 |      |      |      |      |
| 8         | 0.32 | 0.32 | 0.40 | 0.33 | 0.37 | 0.44 | 1.00 |      |      |      |
| 11        | 0.24 | 0.19 | 0.27 | 0.27 | 0.45 | 0.46 | 0.33 | 1.00 |      |      |
| 12        | 0.28 | 0.27 | 0.23 | 0.32 | 0.29 | 0.34 | 0.31 | 0.35 | 1.00 |      |
| 13        | 0.32 | 0.25 | 0.30 | 0.26 | 0.28 | 0.34 | 0.40 | 0.29 | 0.33 | 1.00 |

**Questions: Please tell us how much difficulty you have with the following:**

1. Taking lots of medications
2. Remembering how and when to take medication
4. Collecting prescription medication
5. Monitoring your medical conditions (eg. checking your blood pressure or blood sugar, monitoring your symptoms etc)
6. Arranging appointments with health professionals
7. Seeing lots of different health professionals
8. Attending appointments with health professionals (eg. getting time off work, arranging transport etc)
11. Obtaining clear and up-to-date information about your condition
12. Making recommended lifestyle changes (eg. diet and exercise)
13. Having to rely on help from family and friends

Please note: Questions 3, 9 and 10 were excluded from the main analysis due to a high proportion of 'does not apply' responses.
